# Supplementary material for: A 2D Cu(ii) coordination polymer constructed with 2,5-pyridinedicarboxylic acid linker: synthesis, structural analysis and its selective transformation into Cu and CuO nanoparticles
Source: Royal Society of Chemistry journal article supplement (doi:10.1039/d3nj01906c), 2023-01-01
Supplement: d3nj01906c1.pdf [file d3nj01906c1.pdf]

## A 2D Cu(II) Coordination Polymer Constructed With 2,5-pyridinedicarboxylic acid Linker: Synthesis, Structural Analysis and It's Selective Transformation into Cu and CuO nanoparticles

Gourab Karmakar,<sup>\*a,b</sup> Adish Tyagi,<sup>\*a,b</sup> A. P. Wadawale,<sup>a</sup> Rohit Singh Chauhan<sup>c</sup> and Bal Govind Vats<sup>d</sup>

<sup>a</sup>Chemistry Division, Bhabha Atomic Research Centre, Mumbai- 400 085 (India)

<sup>b</sup>Homi Bhabha National Institute, Anushaktinagar, Mumbai- 400 094 (India)

<sup>c</sup>Department of Chemistry, K. J. Somaiya College of Science and Commerce, Vidyavihar, Mumbai 400077, India.

<sup>d</sup>Fuel Chemistry Division, Bhabha Atomic Research Centre, Mumbai- 400 085 (India).

Email: [gourabk@barc.gov.in](mailto:gourabk@barc.gov.in), [tyagia@barc.gov.in](mailto:tyagia@barc.gov.in)

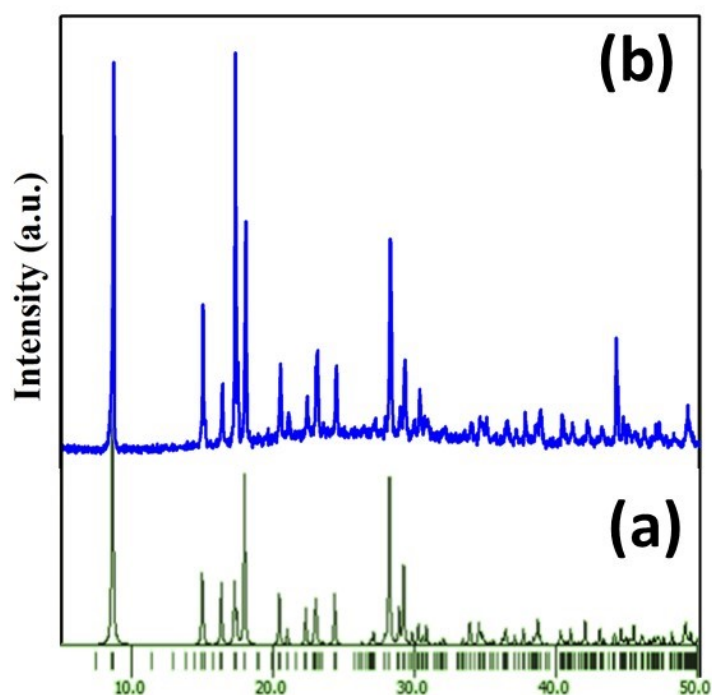

**Figure S1.** (a) simulated and (b) experimental X-ray powder diffraction (pXRD) pattern of  $[\text{Cu}(2,5\text{-PDC})]_n$  (**2D-CuPDC**) respectively.

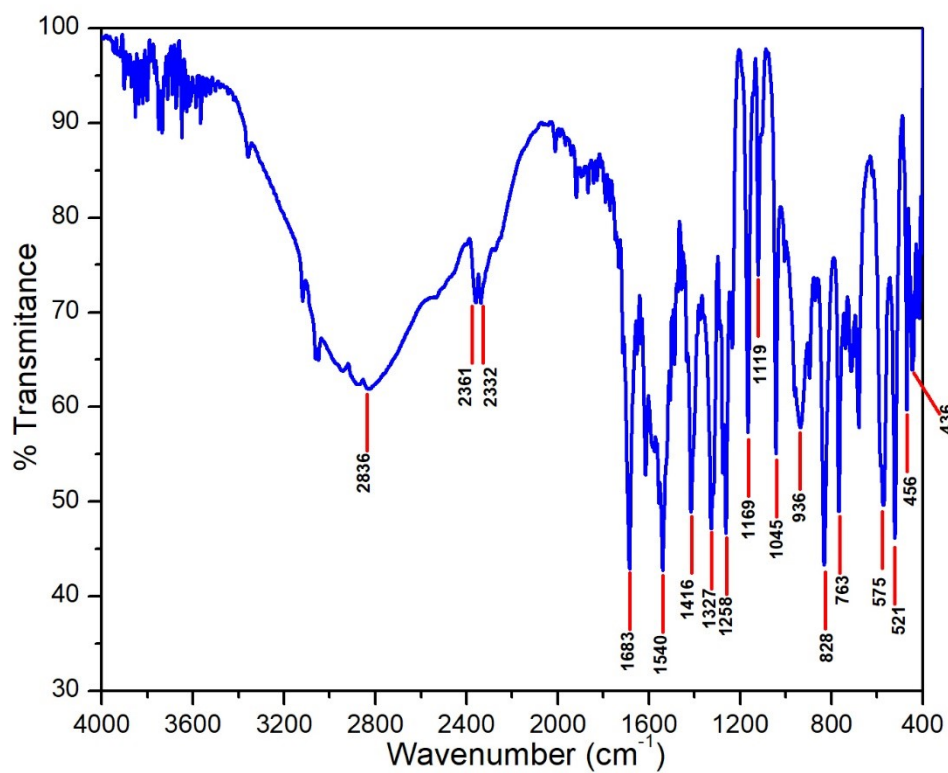

**Figure S2.** IR spectra of *2D-CuPDC*

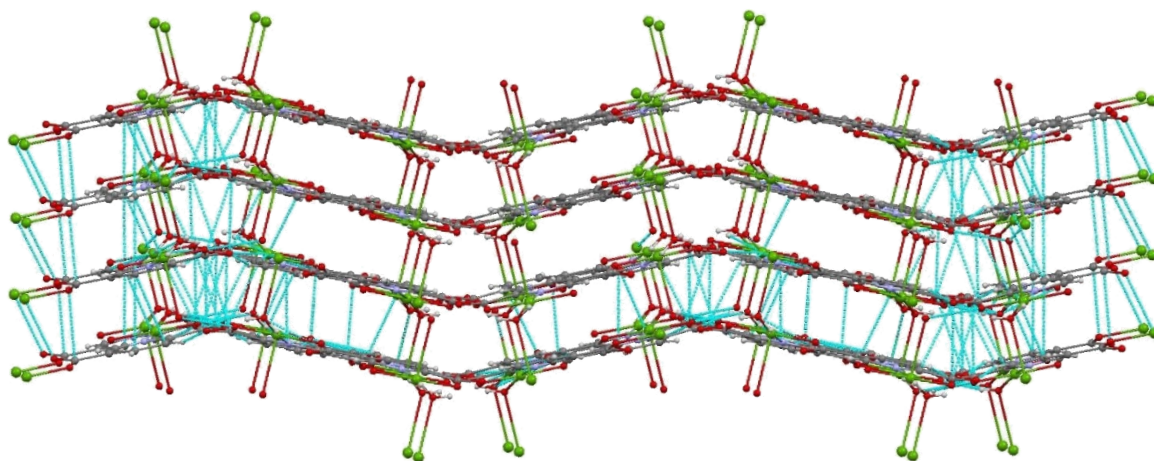

**Figure S3.** 2D networks connected through H-bonding and short contacts forming the layered structure (view along *a*-axis) of *2D-CuPDC*.

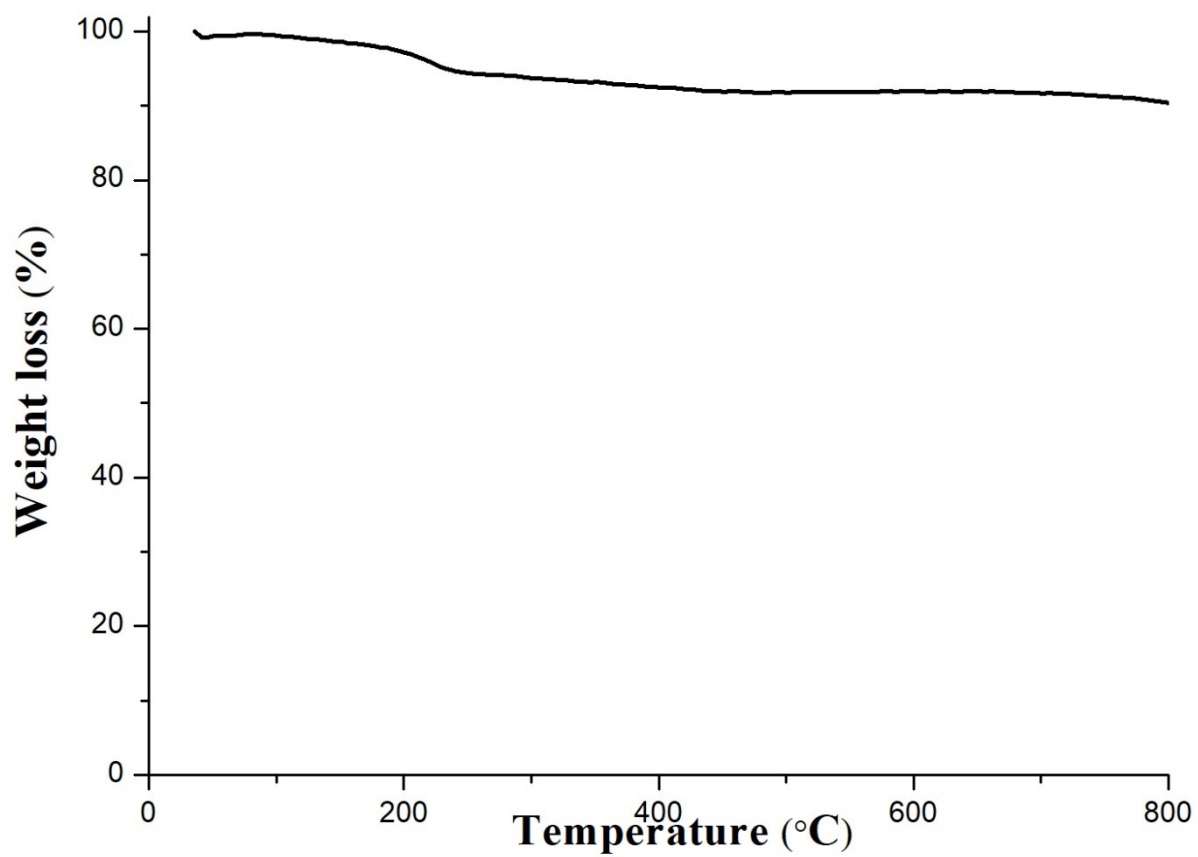

**Figure S4.** Thermogravimetric analysis of Cu nanoparticles.
